# Supplementary material for: Open-air spray plasma deposited UV-absorbing nanocomposite coatings
Source: Royal Society of Chemistry journal article supplement (doi:10.1039/c8nr04095h), 2018-01-01
Supplement: c8nr04095h1.pdf [file c8nr04095h1.pdf]

## Supporting Information

### Open-Air Spray Plasma Deposited UV-Absorbing Nanocomposite Coatings

*Yichuan Ding, Siming Dong, Florian Hilt, and Reinhold H. Dauskardt\**

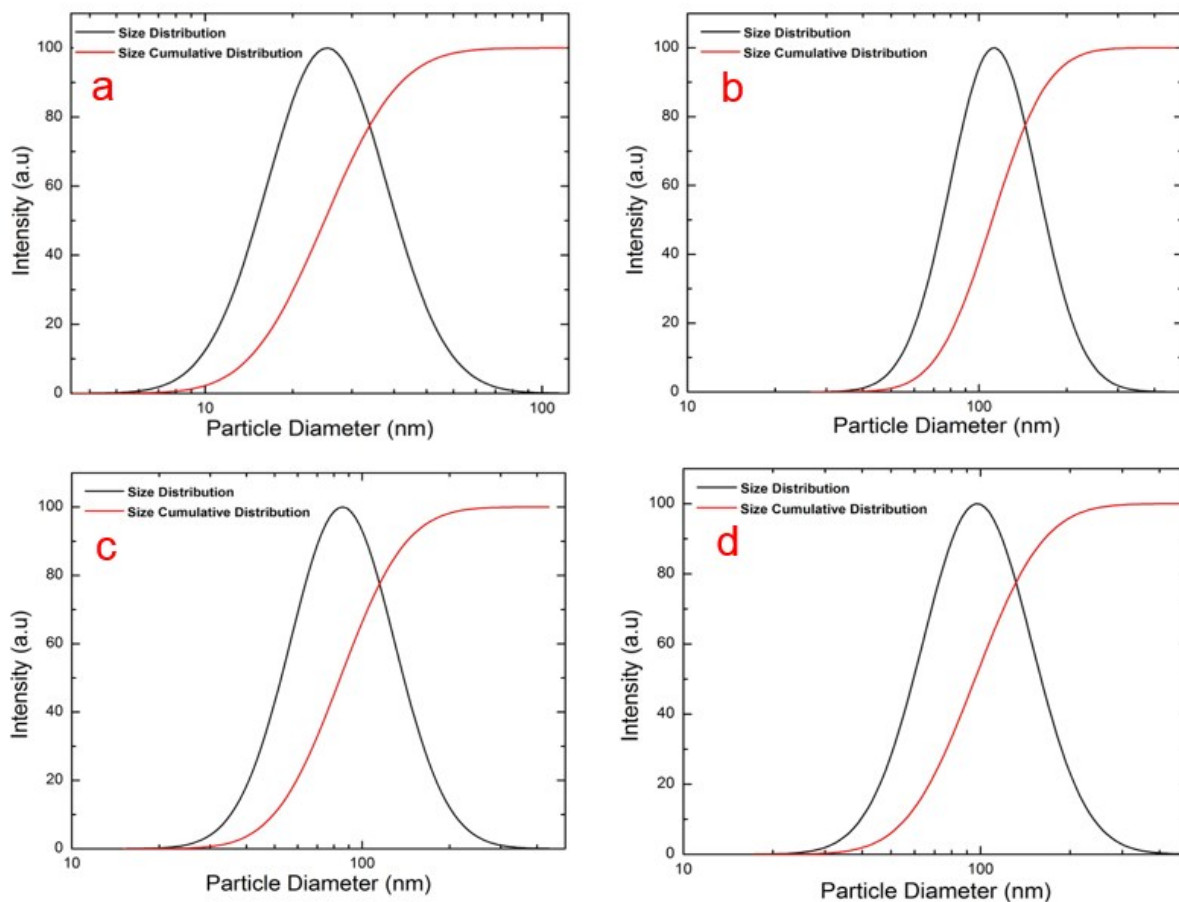

Figure S1. Size distribution of (a) SiO<sub>2</sub> (b) CeO<sub>2</sub> (c) TiO<sub>2</sub> and (d) CeO<sub>2</sub> + TiO<sub>2</sub> (1 : 1 by weight) nanoparticles dispersed in water (1 wt.%) determined by DLS.

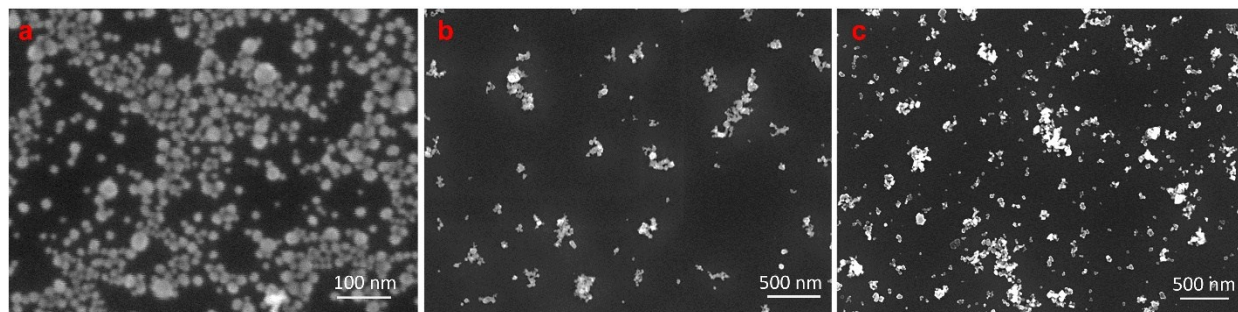

Figure S2. Sprayed (a) SiO<sub>2</sub> (b) CeO<sub>2</sub> and (c) CeO<sub>2</sub> + TiO<sub>2</sub> (1 : 1 by weight) nanoparticles on silicon substrates without matrix deposition

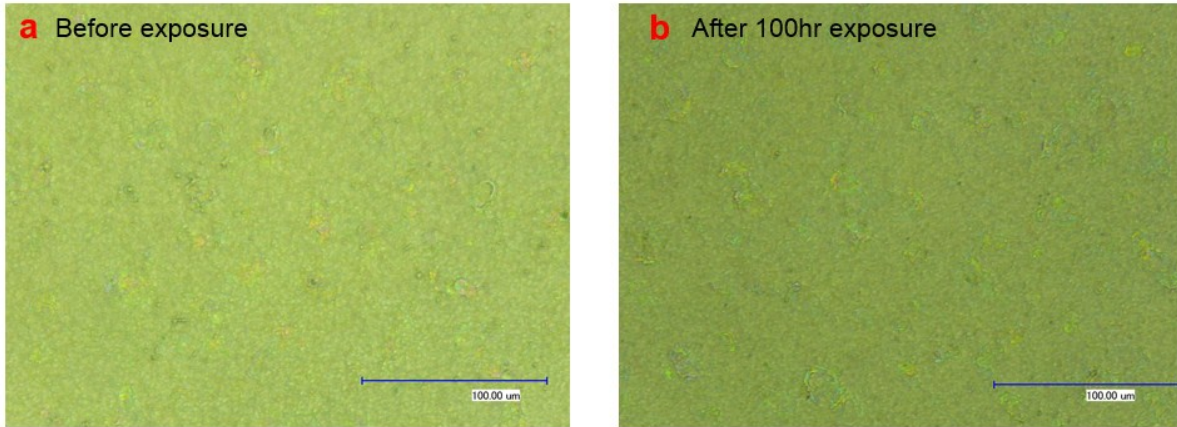

Figure S3. Optical images of NC coatings containing 20 wt.% of CeO<sub>2</sub> nanoparticles before and after 100 hours of intensified UV exposure

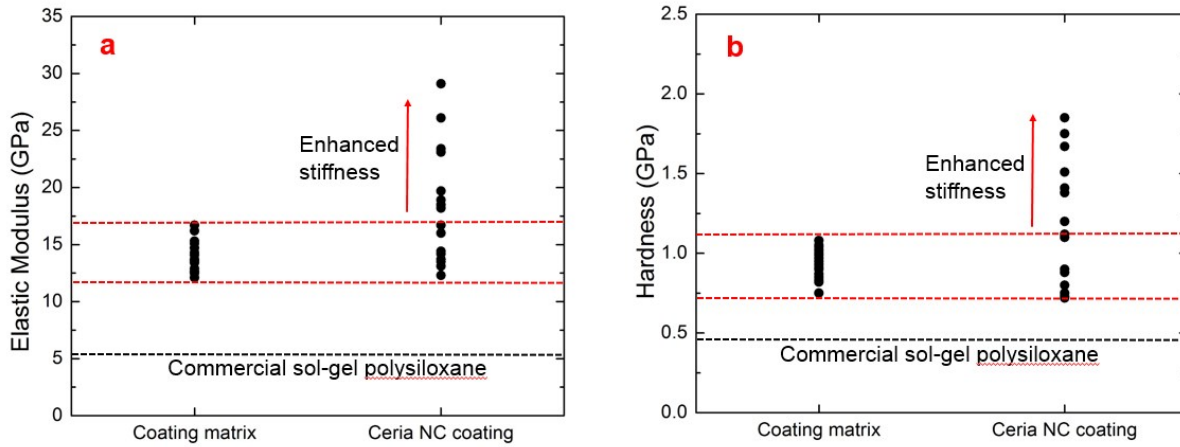

Figure S4. (a) Elastic modulus and (b) hardness of NC coatings containing 20 wt.% of CeO<sub>2</sub> nanoparticles

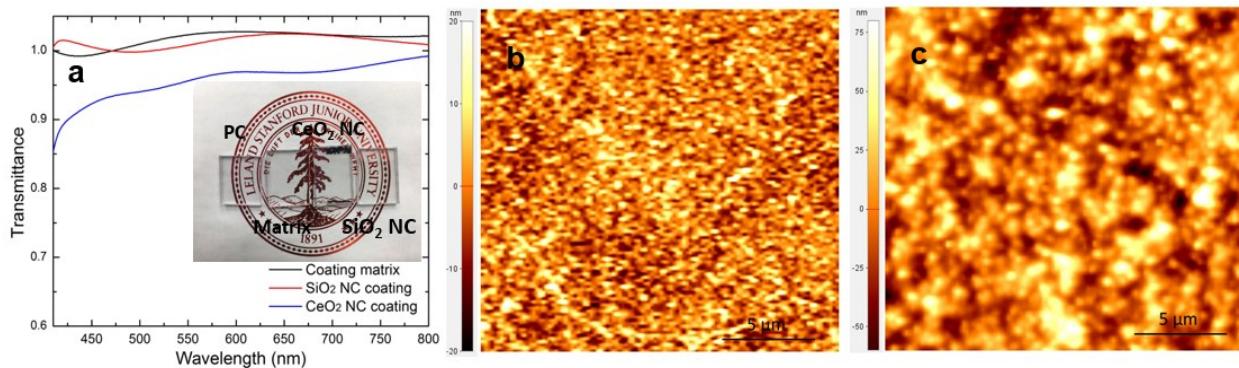

Figure S5. (a) Optical transmittance and surface morphology of NC coatings containing either (b) 20 wt.% SiO<sub>2</sub> or (c) 20 wt.% of CeO<sub>2</sub> nanoparticles deposited on PC substrate.
